# Supplementary material for: Hexagonal Boron Nitride Functionalized with Au Nanoparticles—Properties and Potential Biological Applications
Source: MDPI journal article supplement (doi:10.3390/nano8080605), 2018-08-09
Supplement: s1 [file s1]

*Article*

# Hexagonal Boron Nitride Functionalized With Au Nanoparticles –Properties And Potential Biological Applications

Magdalena Jedrzejczak-Silicka<sup>1,\*</sup>, Martyna Trukawka<sup>2</sup>, Mateusz Dudziak<sup>2</sup>, Katarzyna Piotrowska<sup>3</sup> and Ewa Mijowska<sup>2,\*</sup>

<sup>1</sup> Laboratory of Cytogenetics, West Pomeranian University of Technology, Szczecin, Klemensa Janickiego 29, 71-270 Szczecin, Poland; [mjedrzejczak@zut.edu.pl](mailto:mjedrzejczak@zut.edu.pl) (M.J.-S.)

<sup>2</sup> Nanomaterials Physicochemistry Department, West Pomeranian University of Technology, Szczecin, Piastow Avenue 45, 70 – 311 Szczecin, Poland; [martyna.brylak@zut.edu.pl](mailto:martyna.brylak@zut.edu.pl) (M.T.); [mateusz.dudziak@zut.edu.pl](mailto:mateusz.dudziak@zut.edu.pl) (M.D.); [emijowska@zut.edu.pl](mailto:emijowska@zut.edu.pl) (E.M.)

<sup>3</sup> Department of Physiology, Pomeranian Medical University, Powstancow Wlkp. 72, 70-111 Szczecin, Poland; [piot.kata@gmail.com](mailto:piot.kata@gmail.com) (K.P)

\* Correspondence: [mjedrzejczak@zut.edu.pl](mailto:mjedrzejczak@zut.edu.pl); Tel.: +48-914-496-804; [emijowska@zut.edu.pl](mailto:emijowska@zut.edu.pl); Tel.: +48-914-494-742;

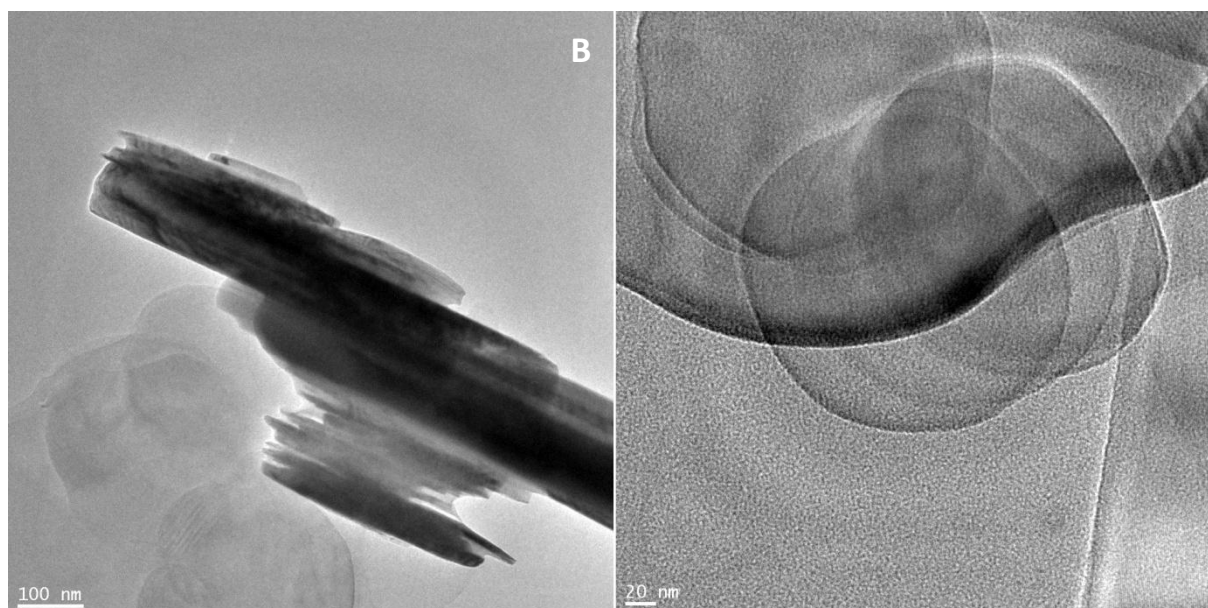

**Figure S1.** Transmission electron microscopy images of commercial (A) and exfoliated h-BN (B).

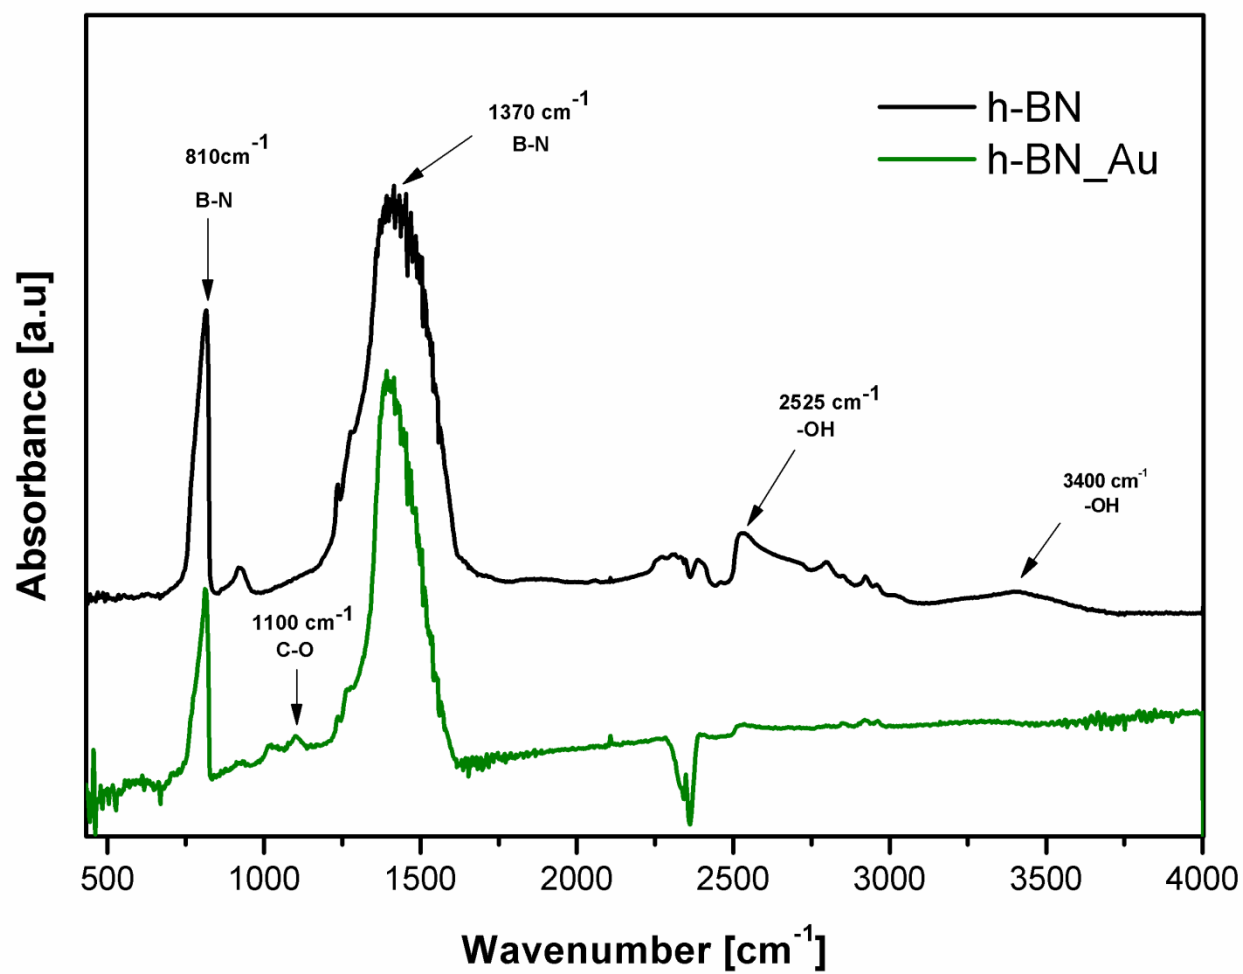

**Figure S2.** FT-IR spectra of h-BN and h-BN<sub>Au</sub>.

A

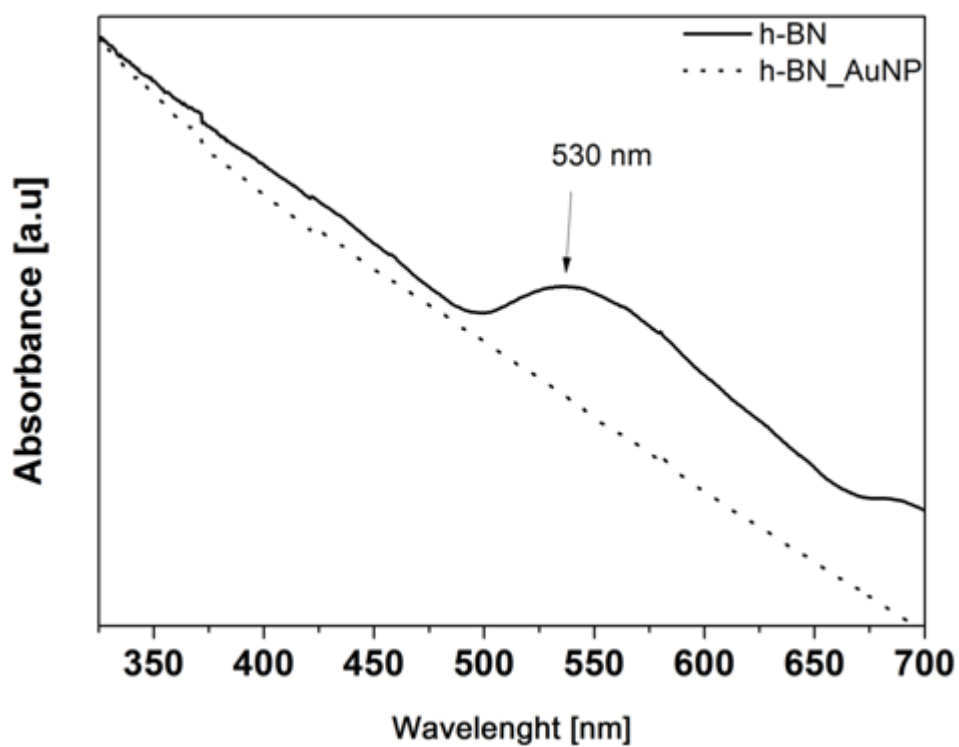

B

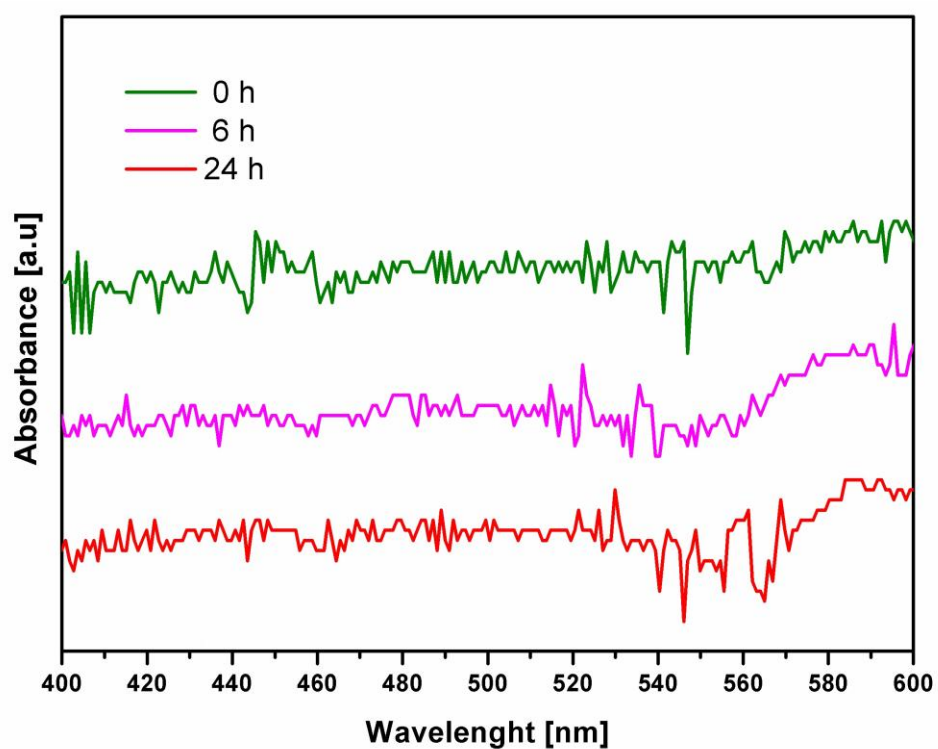

**Figure S3.** UV-Vis spectra of h-BN and h-BN\_AuNP nanocomposite (A) and stability of h-BN and Au nanoparticles connection (B).

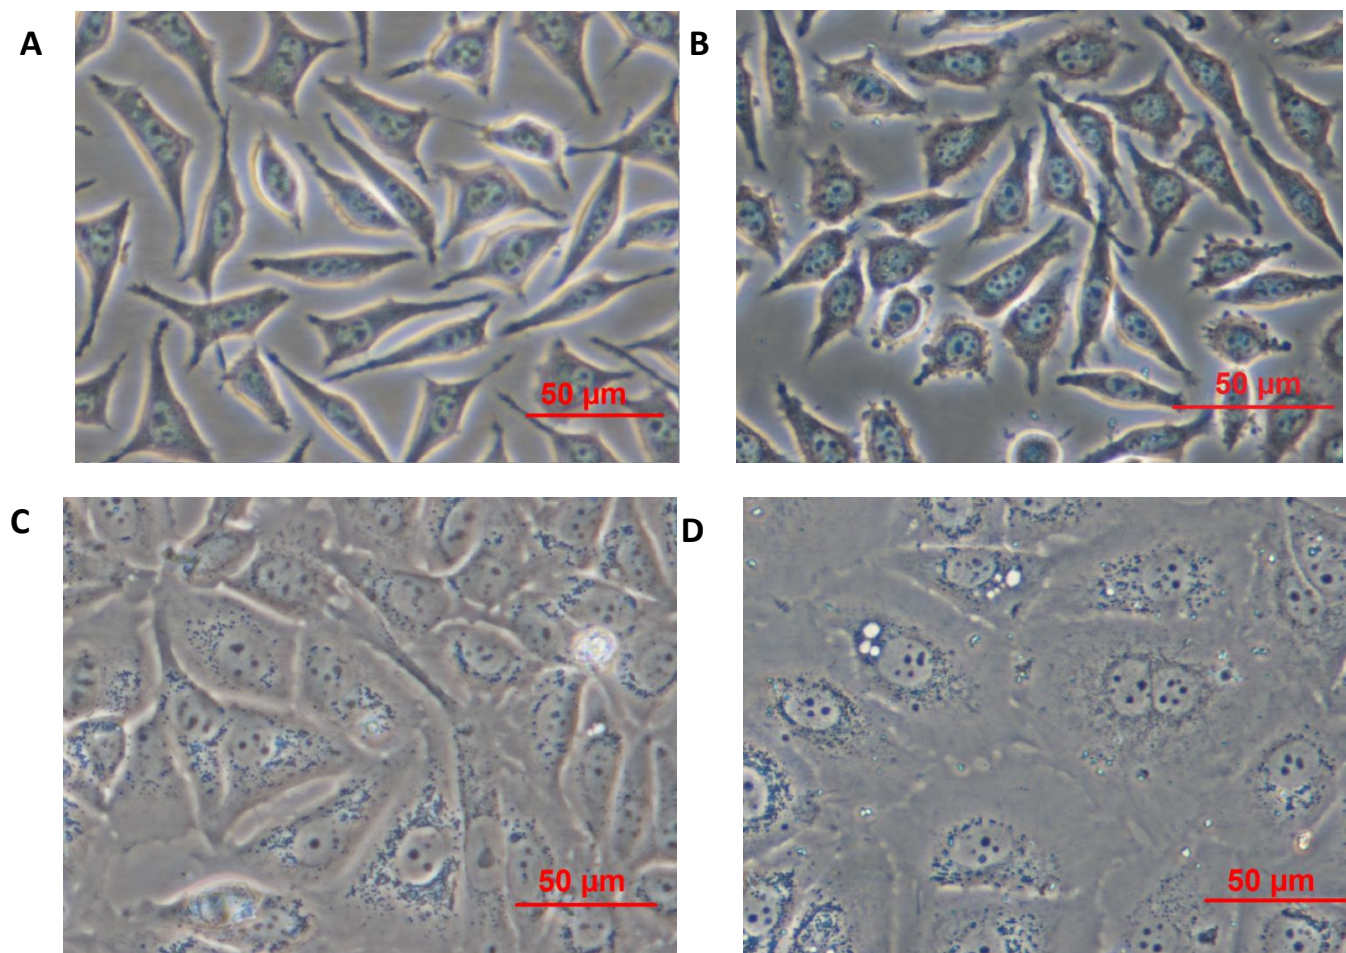

**Figure S4.** The morphology of L929 and MCF-7 cell lines. The L929 control culture (A), cell culture after incubation with the h-BN\_AuNP nanocomposite (B), MCF-7 control culture (C) and MCF-7 cells after incubation with the h-BN\_AuNP nanocomposite (D).

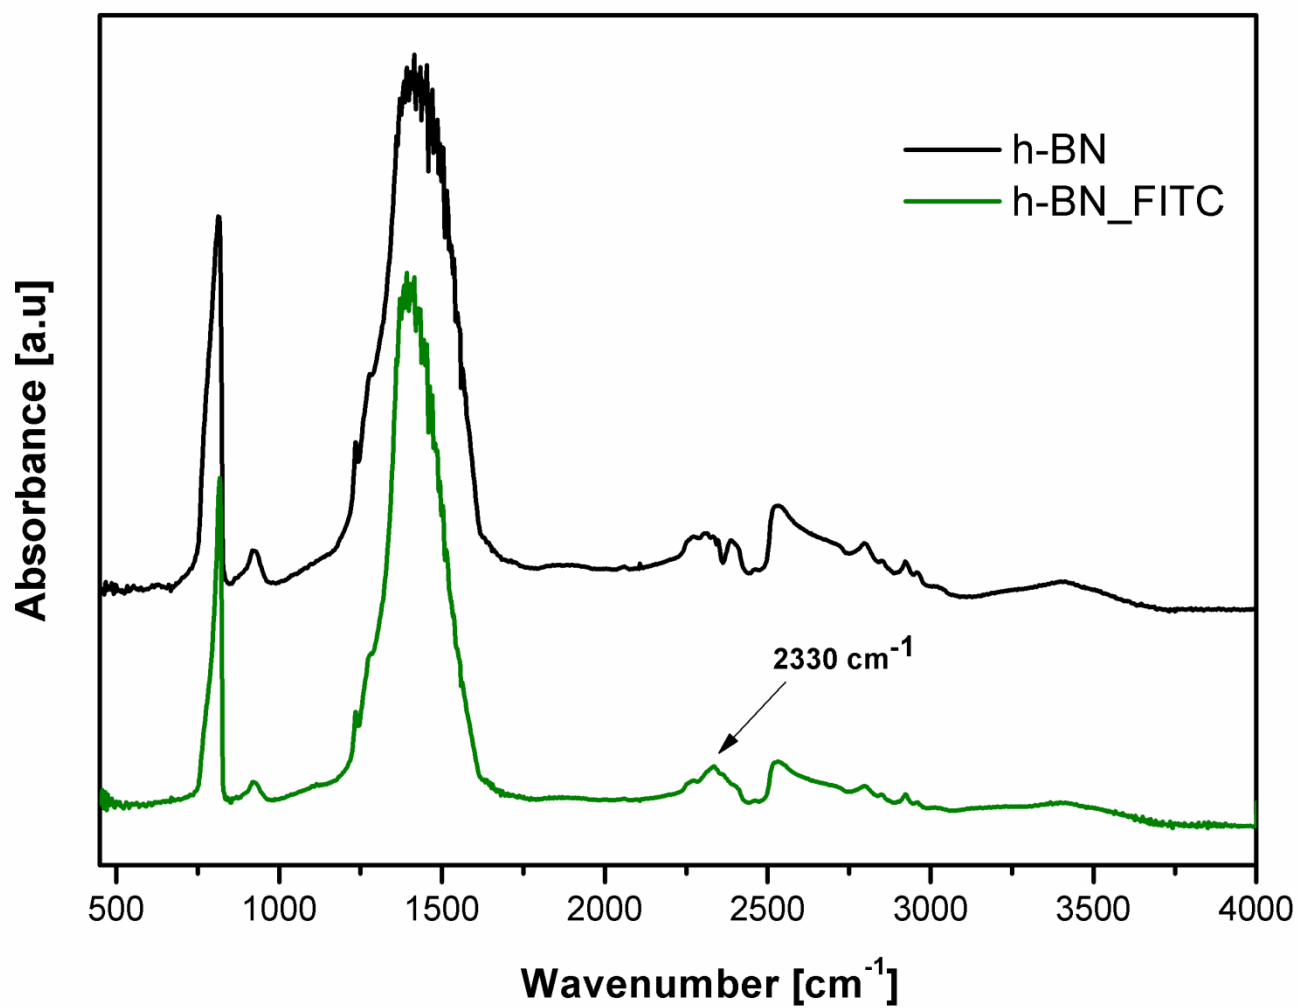

**Figure S5.** FT-IR spectra of h-BN and h-BN-FITC.
